# Supplementary material for: Development of recyclable magnetic cross-linked enzyme aggregates for the synthesis of high value rare sugar d-tagatose in aqueous phase catalysis
Source: Royal Society of Chemistry journal article supplement (doi:10.1039/d0cy02397c), 2021-01-01
Supplement: d0cy02397c1.pdf [file d0cy02397c1.pdf]

## Supplementary

### **Development of Recyclable Magnetic Cross Linked Enzyme Aggregates for the Synthesis of High Value Rare Sugar D-Tagatose in Aqueous Phase Catalysis**

Shushil Kumar Rai<sup>1,2</sup>, Varun Kumar<sup>1</sup> and Sudesh Kumar Yadav<sup>1\*</sup>

<sup>1</sup>Biotechnology and Synthetic Biology, Center of Innovative and Applied Bioprocessing (CIAB), Sector-81, (Knowledge City), Mohali 140306, India

<sup>2</sup>Dept. of Microbial Biotechnology, Panjab University, Sector 25, Chandigarh 160014, India

\*Corresponding author: [sudesh@ciab.res.in](mailto:sudesh@ciab.res.in), [skyt@rediffmail.com](mailto:skyt@rediffmail.com).

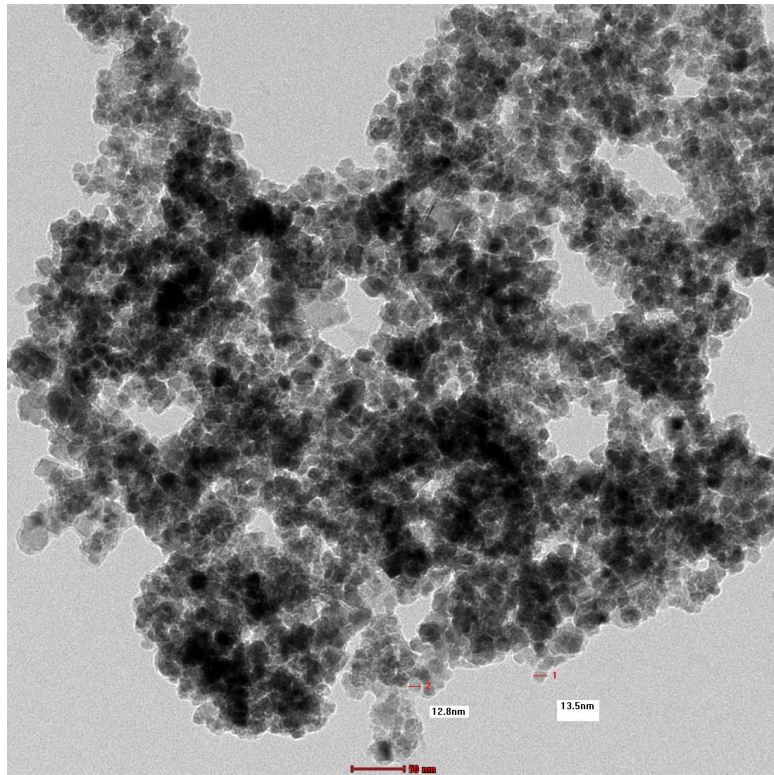

Figure S1. Transmission electron microscopy image (TEM) of magnetic nanoparticle at 50 nm scale bar.

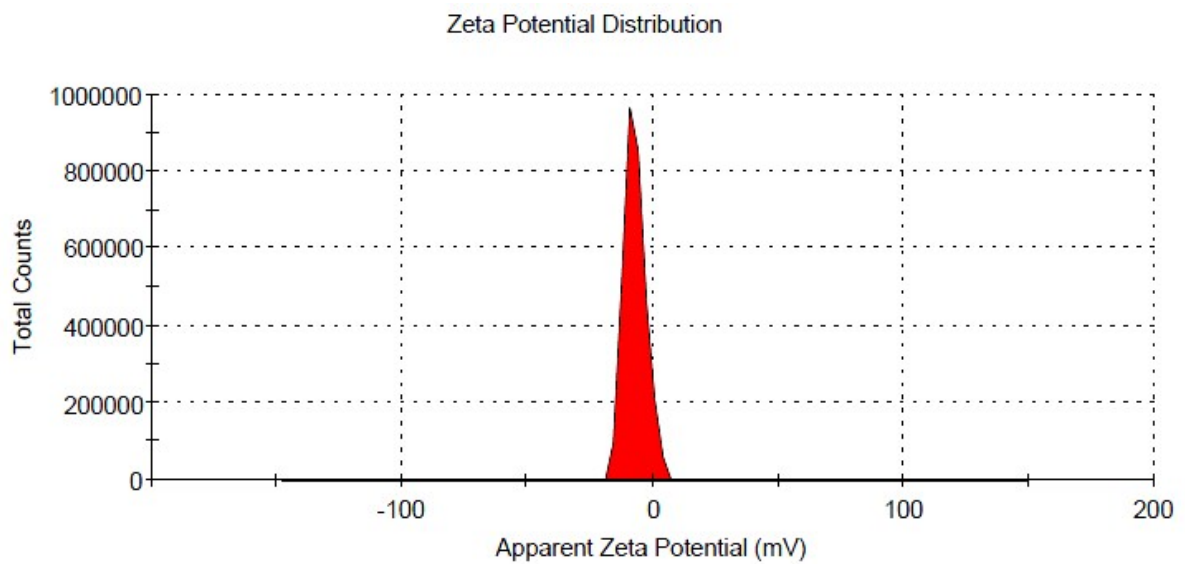

Figure S2. Zeta potential distribution graph of non-functionalized magnetic nanoparticles (MNP) showed a negative value of Zeta potential  $-7.22 \pm 4.28$ .

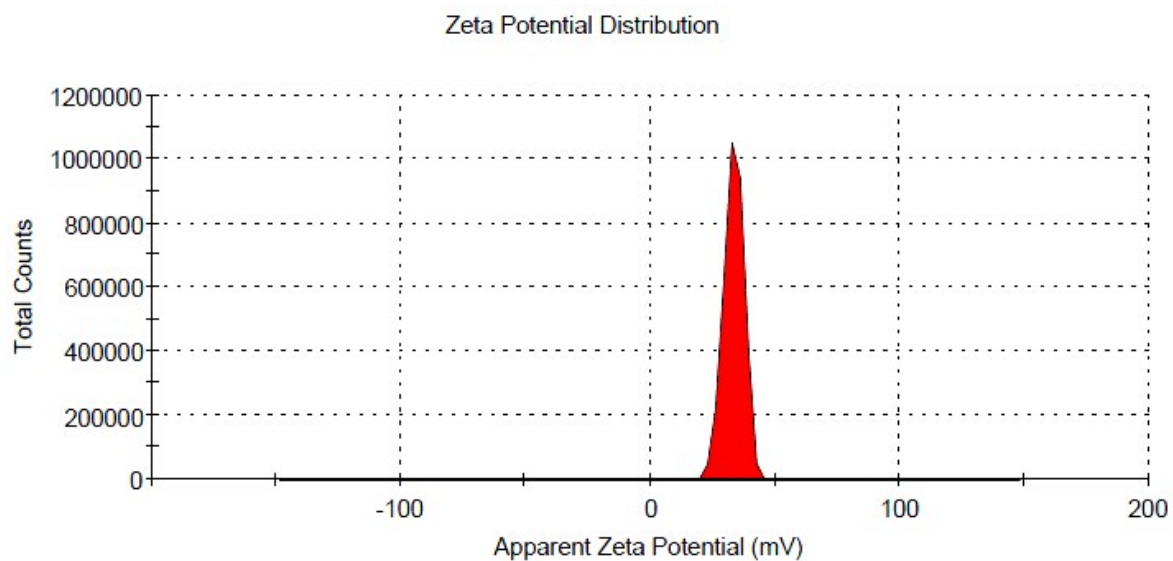

Figure S3. Zeta potential distribution graph of APTES functionalized magnetic nanoparticles (F-MNP) showed a positive value of Zeta potential  $33.4 \pm 3.96$ .

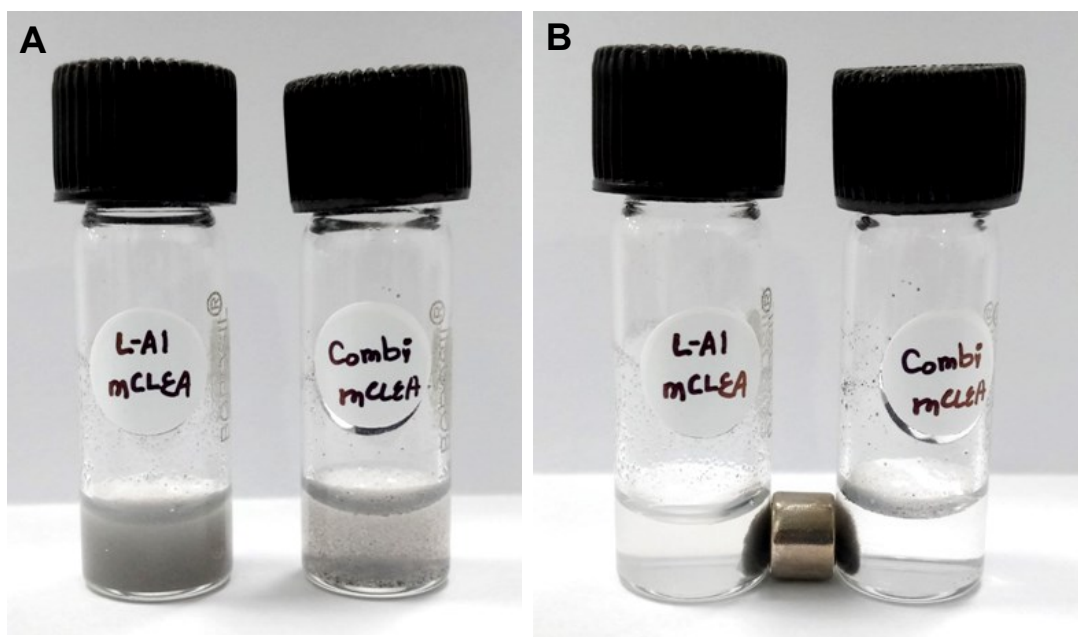

Figure S4. Photograph of immobilized L-AI mCLEA and Combi-CLEA recovered from the reaction mixture in a batch operation using an external magnet.
